# Supplementary material for: In situ determination of dissolution kinetics of d-limonene in supercritical carbon dioxide by Raman spectroscopy
Source: Royal Society of Chemistry journal article supplement (doi:10.1039/c7nj02549a), 2017-01-01
Supplement: c7nj02549a1.pdf [file c7nj02549a1.pdf]

## ***In-situ* determination of dissolution kinetics of D-limonene in supercritical carbon dioxide by Raman spectroscopy**

Cristiana Nilsson Buzolin, Marta Espina Palanco, Ola F. Wendt, Irene Rodriguez-Meizoso\*

Lund University, Department of Chemistry, Centre for Analysis and Synthesis, P.O. Box 124, SE-22100, Lund, Sweden

*In situ*, Raman spectroscopy, dissolution kinetics, supercritical carbon dioxide, limonene, solubility.

New Journal of Chemistry

**ABSTRACT:** Fig. S1 in this Supporting information shows that we can associate the intensity of the Raman peak with either peak height or peak area since height and area values follow the same tendency. Fig. S2 shows the error associated to the optical system.

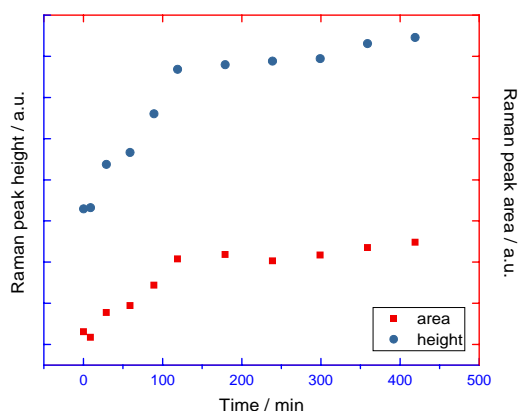

Fig. S1. Intensity of limonene peak vs time expressed as peak height (blue solid circles) and peak area (red solid squares).

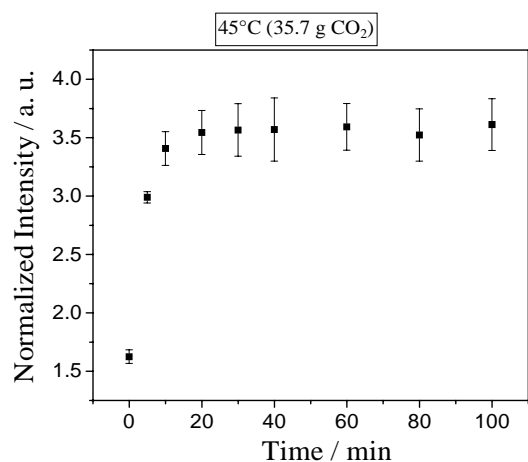

Fig. S2. Dissolution profile of D-limonene in scCO<sub>2</sub> at 45 °C with 35.7 g (pressure of 8.4 MPa). Each dot is the height of a Raman signal from limonene averaged from 15 spectra. Error bars indicate the standard deviation associated for each time point.
